# Supplementary material
Source: PubMed Central journal article supplement (PMC3974350)
Supplement: CJN.03610413_CJN03610413SupplementaryData.pdf [file CJN.03610413_CJN03610413SupplementaryData.pdf]

Supplemental table 1: Body surface areas calculated with the different formulas using ideal weight and real weight.

| <b>BSA</b>                       | <b>With ideal weight</b> | <b>With real weight</b> |
|----------------------------------|--------------------------|-------------------------|
| <b>BSA (Dubois and Dubois)</b>   | 1.67 ± 0.15              | 2.01 ± 0.2              |
| <b>BSA (Haycock)</b>             | 1.68 ± 0.14              | 2.11 ± 0.22 *           |
| <b>BSA (Gehand and Georges)</b>  | 1.68 ± 0.14              | 2.12 ± 0.21 *           |
| <b>BSA (Livingstone and Lee)</b> | 1.67 ± 0.13              | 2.22 ± 0.23 *           |

BSA= Body surface area expressed as mean ± standard deviation.

\* p<0.05 vs BSA measured with Dubois nad Dubois and real weight.
